# Supplementary material for: Characteristics of nanoparticle formation and hazardous air pollutants emitted by 3D printer operations: from emission to inhalation
Source: Royal Society of Chemistry journal article supplement (doi:10.1039/c9ra03248g), 2019-01-01
Supplement: c9ra03248g1.pdf [file c9ra03248g1.pdf]

## Supplementary Information

### Characteristics of Nanoparticle Formation and Hazardous Air Pollutants Emitted by 3D Printer Operations: from Emission to Inhalation

Jong-Sang Youn<sup>1)</sup>, Jeong-Won Seo<sup>2)</sup>, Sehyun Han<sup>1)</sup> and Ki-Joon Jeon<sup>1)\*</sup>

<sup>1)</sup>Department of Environmental Engineering, Inha University, Michuhol-gu, Incheon 22212,  
Korea

<sup>2)</sup>Department of Ophthalmology, Hallym University, Dongtan Sacred Heart Hospital 7,  
Hwaseong-si, Gyeonggi-do, Republic of Korea

S1. Room layout:

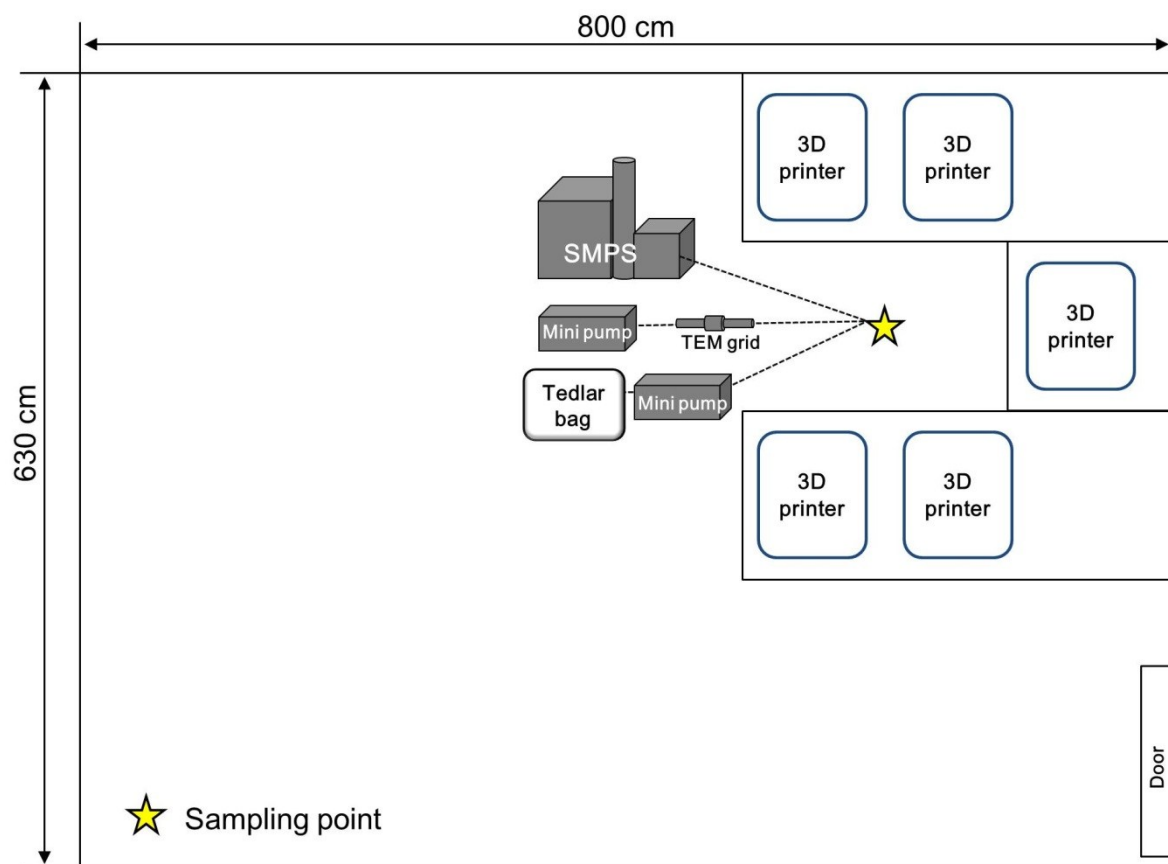

Fig. S1. Room layout and experimental setup.

S2. MPPD model parameters:

**Table S1. MPPD model input parameters**

| Parameter                                     |                         |
|-----------------------------------------------|-------------------------|
| Lung model                                    | Yeh/Schum symmetric     |
| Airway flow                                   | Uniform                 |
| Function residual capacity (ml)               | 3300                    |
| Upper respiratory tract volume (ml)           | 50                      |
| Particle density (g cm <sup>-3</sup> )        | 1                       |
| Diameter (nm)                                 | 10.9 - 372              |
| Acceleration of gravity (cm s <sup>-2</sup> ) | 981                     |
| Breathing scenario                            | Oronasal-mouth breather |
| Breathing frequency (min <sup>-1</sup> )      | 12                      |
| Tidal volume (cm <sup>3</sup> )               | 625                     |

### S3. Airway generation surface area

**Table S2.**

| Airway generation number | Surface area (cm <sup>2</sup> ) |
|--------------------------|---------------------------------|
| 1                        | 6.074                           |
| 2                        | 22.94                           |
| 3                        | 16.51                           |
| 4                        | 23.64                           |
| 5                        | 33.78                           |
| 6                        | 39.62                           |
| 7                        | 52.81                           |
| 8                        | 80.15                           |
| 9                        | 98.72                           |
| 10                       | 137                             |
| 11                       | 169.7                           |
| 12                       | 212                             |
| 13                       | 264.5                           |
| 14                       | 346.6                           |
| 15                       | 454.3                           |
| 16                       | 673.4                           |
| 17                       | 1045                            |
| 18                       | 1673                            |
| 19                       | 2785                            |
| 20                       | 4190                            |
| 21                       | 6015                            |
| 22                       | 7829                            |
| 23                       | 9373                            |
| 24                       | 10640                           |
| 25                       | 10880                           |
| 26                       | 9692                            |
| 27                       | 8270                            |
| 28                       | 6657                            |

S4. HAPs species concentrations:

**Table S3**

| Species                  | Concentrations (ppb) | Health Effects                                    |
|--------------------------|----------------------|---------------------------------------------------|
| Acrylonitrile            | 3.36                 | Carcinogen (Group 2B)                             |
| Methylene chloride       | 1.64                 | Carcinogen (Group 2A)                             |
| Hexane                   | 8.46                 | CNS effect                                        |
| Chloroform               | 0.32                 | Carcinogen (Group 2B)                             |
| Benzene                  | 0.52                 | Carcinogen (Group 1)                              |
| Trichloroethylene        | 0.09                 | Carcinogen (Group 1)                              |
| Toluene                  | 1.65                 | CNS effect                                        |
| Tetrachloroethylene      | 0.02                 | Carcinogen (Group 2A)                             |
| Chlorobenzene            | 0.16                 | Narcosis, tremors, and muscle disorder            |
| Xylene                   | 1.28                 | CNS effect                                        |
| Styrene                  | 0.33                 | Carcinogen (Group 2A)                             |
| 1,4-Dichlorobenzene      | 0.30                 | Severe irritation to the eyes, skin, and throat   |
| 1,2,4-Trichlorobenzene   | 0.26                 | CNS effect                                        |
| Hexachloro 1,3-butadiene | 0.27                 | Cardiac disease, disturbances of nervous function |

Groups of carcinogen classified by the IARC monographs

- Group 1: Carcinogenic to human (120 agents)
- Group 2A: probably carcinogenic to human (82 agents)
- Group 2B: Possibly carcinogenic to human (311 agents)
- Group 3: Not classifiable as to its carcinogenicity to human (499 agents)
- Group 4: Probably not carcinogenic to humans (1 agent)

**References**

International Agency for Research on Cancer Website: <https://monographs.iarc.fr/list-of-classifications-volumes/>

Toxicology Data Network Website: <https://toxnet.nlm.nih.gov/index.html>
